# Supplementary material
Source: publisher figshare collection journal article supplement (https://acs.figshare.com/ndownloader/files/4064671)
Supplement: Supplementary file 1 [file 4064671]

#==============================================================================
data_global
#==============================================================================

_publ_requested_journal             Org.Lett.
_publ_contact_author               'Stephen G. Davies'
_publ_contact_author_phone         '+44 1865 275695'
_publ_contact_author_fax           '+44 1865 275633'
_publ_contact_author_email          steve.davies@chem.ox.ac.uk

loop_
_publ_author_name
_publ_author_address
'Davies, Stephen G.'
;Department of Chemistry
Chemistry Research Laboratory
University of Oxford
Mansfield Road
Oxford
OX1 3TA
U.K.
;
'Figuccia, Aude L. A.'
;Department of Chemistry
Chemistry Research Laboratory
University of Oxford
Mansfield Road
Oxford
OX1 3TA
U.K.
;
'Fletcher, Ai M.'
;Department of Chemistry
Chemistry Research Laboratory
University of Oxford
Mansfield Road
Oxford
OX1 3TA
U.K.
;
'Roberts, Paul M.'
;Department of Chemistry
Chemistry Research Laboratory
University of Oxford
Mansfield Road
Oxford
OX1 3TA
U.K.
;
'Thomson, James E.'
;Department of Chemistry
Chemistry Research Laboratory
University of Oxford
Mansfield Road
Oxford
OX1 3TA
U.K.
;
_journal_name_full                 'Org.Lett.'
_journal_volume                    '?'
_journal_page_first                '?'
_journal_page_last                 '?'
_journal_year                      '2013'
_ccdc_journal_depnumber            '926152-926154'

_publ_section_title
;
Asymmetric Syntheses of (-)-1-Deoxymannojirimycin and 
(+)-1-Deoxyallonojirimycin via a Ring-Expansion Approach

;
_publ_section_abstract
;  
The asymmetric syntheses of (-)-1-deoxymannojirimycin and 
(+)-1-deoxyallonojirimycin are described herein. The ring-closing iodoamination 
of two epimeric bishomoallylic amines to give the corresponding 
5-iodomethyl-pyrrolidines was followed by in situ ring-expansion to give two 
diastereoisomerically pure (>99:1 dr) cyclic carbonates. Subsequent deprotection 
gave (-)-1-deoxymannojirimycin and (+)-1-deoxyallonojirimycin as single 
diastereoisomers in 7.4 and 3.3% overall yield, respectively, from commercially 
available starting materials.
;

#==============================================================================
data_13 
_ccdc_journal_depnumber            '926152'
#==============================================================================

_cell_length_a                    12.8417(4)
_cell_length_b                    6.65220(10)
_cell_length_c                    14.8628(5)
_cell_angle_alpha                 90
_cell_angle_beta                  109.357(4)
_cell_angle_gamma                 90
_cell_volume                      1197.89(6)
 
_symmetry_cell_setting            'Monoclinic' 
_symmetry_space_group_name_H-M    'P 1 21 1' 
_symmetry_space_group_name_Hall   'P 2yb' 
loop_
 _symmetry_equiv_pos_as_xyz
 'x,y,z'
 '-x,y+1/2,-z'

loop_
_atom_type_symbol
_atom_type_scat_dispersion_real
_atom_type_scat_dispersion_imag
_atom_type_scat_Cromer_Mann_a1
_atom_type_scat_Cromer_Mann_b1
_atom_type_scat_Cromer_Mann_a2
_atom_type_scat_Cromer_Mann_b2
_atom_type_scat_Cromer_Mann_a3
_atom_type_scat_Cromer_Mann_b3
_atom_type_scat_Cromer_Mann_a4
_atom_type_scat_Cromer_Mann_b4
_atom_type_scat_Cromer_Mann_c
_atom_type_scat_source  
 C       0.0181   0.0091   2.3100  20.8439   1.0200  10.2075   1.5886   0.5687
   0.8650  51.6512   0.2156 'International Tables Vol C 4.2.6.8 and 6.1.1.4'
 H       0.0000   0.0000   0.4930  10.5109   0.3229  26.1257   0.1402   3.1424
   0.0408  57.7998   0.0030 'International Tables Vol C 4.2.6.8 and 6.1.1.4'
 N       0.0311   0.0180  12.2126   0.0057   3.1322   9.8933   2.0125  28.9975
   1.1663   0.5826 -11.5290 'International Tables Vol C 4.2.6.8 and 6.1.1.4'
 O       0.0492   0.0322   3.0485  13.2771   2.2868   5.7011   1.5463   0.3239
   0.8670  32.9089   0.2508 'International Tables Vol C 4.2.6.8 and 6.1.1.4'
 
_cell_formula_units_Z                    2

# Given Formula = C28 H33 N1 O3 
# Dc =      1.20 Fooo =    464.00 Mu =      6.05 M =    431.57
# Found Formula = C28 H33 N1 O3 
# Dc =      1.20 FOOO =    464.00 Mu =      6.05 M =    431.57

_chemical_formula_sum             'C28 H33 N1 O3'
_chemical_formula_moiety          'C28 H33 N1 O3'
_chemical_compound_source                .
_chemical_formula_weight            431.57
 
_cell_measurement_reflns_used         6421
_cell_measurement_theta_min              3
_cell_measurement_theta_max             85
_cell_measurement_temperature          150
 
_exptl_crystal_description        'block' 
_exptl_crystal_colour             'colourless' 
_exptl_crystal_size_min           0.050 
_exptl_crystal_size_mid           0.060 
_exptl_crystal_size_max           0.190 
 
_exptl_crystal_density_diffrn     1.196 
_exptl_crystal_density_meas       . 
_exptl_crystal_density_method     'not measured' 
# Non-dispersive F(000): 
_exptl_crystal_F_000              464 
_exptl_absorpt_coefficient_mu     0.605 
 
# Sheldrick geometric approximatio 0.96 0.97 
_exptl_absorpt_correction_type    multi-scan 
_exptl_absorpt_process_details    'CrysAlis, (Oxford Diffraction, 2002)' 
_exptl_absorpt_correction_T_min   0.68 
_exptl_absorpt_correction_T_max   0.97 
_diffrn_measurement_device_type   'Oxford Diffraction SuperNova' 
_diffrn_measurement_device        'Area' 
_diffrn_radiation_monochromator   'graphite' 
_diffrn_radiation_type            'Cu K\a'
_diffrn_radiation_wavelength           1.54180
_diffrn_measurement_method        \w 
 
# If a reference occurs more than once, delete the author 
# and date from subsequent references. 
_computing_data_collection        'SuperNova, (Oxford Diffraction, 2010)' 
_computing_cell_refinement        'CrysAlis, (Oxford Diffraction, 2002)' 
_computing_data_reduction         'CrysAlis, (Oxford Diffraction, 2002)' 
_computing_structure_solution     'SIR92 (Altomare et al., 1994)' 
_computing_structure_refinement   'CRYSTALS (Betteridge et al., 2003)' 
_computing_publication_material   'CRYSTALS (Betteridge et al., 2003)' 
_computing_molecular_graphics     'CAMERON (Watkin et al., 1996)' 
 
_diffrn_standards_interval_time   . 
_diffrn_standards_interval_count  . 
_diffrn_standards_number          0 
_diffrn_standards_decay_%         . 
 
_diffrn_ambient_temperature        150
_diffrn_reflns_number             14135 
_reflns_number_total              4855 
_diffrn_reflns_av_R_equivalents   0.033 
# Number of reflections without Friedels Law is 4855 
# Number of reflections with Friedels Law is 2713 
# Theoretical number of reflections is about 2177 
 
_diffrn_reflns_theta_min          3.151 
_diffrn_reflns_theta_max          80.134 
_diffrn_measured_fraction_theta_max 0.951 
 
_diffrn_reflns_theta_full         68.915 
_diffrn_measured_fraction_theta_full 0.995 
 
_diffrn_reflns_limit_h_min        -15 
_diffrn_reflns_limit_h_max        13 
_diffrn_reflns_limit_k_min        -8 
_diffrn_reflns_limit_k_max        8 
_diffrn_reflns_limit_l_min        -14 
_diffrn_reflns_limit_l_max        18 
_reflns_limit_h_min               -15 
_reflns_limit_h_max               15 
_reflns_limit_k_min               -8 
_reflns_limit_k_max               8 
_reflns_limit_l_min               0 
_reflns_limit_l_max               18 
 
_oxford_diffrn_Wilson_B_factor    2.63 
_oxford_diffrn_Wilson_scale       0.02 
 
_atom_sites_solution_primary      Direct #heavy,direct,difmap,geom
# _atom_sites_solution_secondary  difmap
_atom_sites_solution_hydrogens    difmap
 
_refine_diff_density_min          -0.28 
_refine_diff_density_max          0.23 
 
# The current dictionary definitions do not cover the 
# situation where the reflections used for refinement were 
# selected by a user-defined sigma threshold 
 
# The values actually used during refinement 
_oxford_reflns_threshold_expression_ref     I>-3.0\s(I)
_refine_ls_number_reflns          4265 
_refine_ls_number_restraints      1 
_refine_ls_number_parameters      290 
_oxford_refine_ls_R_factor_ref    0.0469 
_refine_ls_wR_factor_ref          0.1101 
_refine_ls_goodness_of_fit_ref    0.9380 
_refine_ls_shift/su_max           0.0001163 
_refine_ls_shift/su_mean          0.0000172 
 
# The values computed from all data 
_oxford_reflns_number_all         4265 
_refine_ls_R_factor_all           0.0469 
_refine_ls_wR_factor_all          0.1101 
 
# The values computed with a 2 sigma cutoff - a la SHELX 
_reflns_threshold_expression      I>2.0\s(I)
_reflns_number_gt                 3915 
_refine_ls_R_factor_gt            0.0376 
_refine_ls_wR_factor_gt           0.0861 
 
_refine_ls_abs_structure_Flack    . 
_refine_ls_abs_structure_details  'Flack (1983), 2142 Friedel-pairs' 
# choose from: rm (reference molecule of known chirality), 
# ad (anomolous dispersion - Flack), rmad (rm and ad), 
# syn (from synthesis), unk (unknown) or . (not applicable). 
_chemical_absolute_configuration  'ad' 
 
_refine_ls_structure_factor_coef  Fsqd 
_refine_ls_matrix_type            full
_refine_ls_hydrogen_treatment     constr         # none, undef, noref, refall,
                                                 # refxyz, refU, constr or mixed
_refine_ls_weighting_scheme       calc 
_refine_ls_weighting_details 
;
 Method= Modified Sheldrick 
 w=1/[\s^2^(F^2^) + ( 0.03P)^2^ + 1.42P] 
 ,where P=(max(Fo^2^,0) + 2Fc^2^)/3 
;
# Insert your own references if required - in alphabetical order 
_publ_section_references 
; 
Oxford Diffraction, (2010). CrysAlisPro. 
 
Oxford Diffraction, (2010). Supernova User Manual. 
 
Betteridge, P.W., Carruthers, J.R., Cooper, R.I., 
Prout, K. & Watkin, D.J. (2003). J. Appl. Cryst. 36, 1487. 
 
Watkin, D.J., Prout, C.K. & Pearce, L.J. (1996). CAMERON, Chemical 
Crystallography Laboratory, Oxford, UK. 
 
Altomare, A., Cascarano, G., Giacovazzo, C., Guagliardi, A., Burla, M.C., 
Polidori, G. & Camalli, M. (1994). J. Appl. Cryst. 27, 435. 
 
Flack, H. D. (1983). Acta Cryst. A39, 876-881. 
; 

# Uequiv = arithmetic mean of Ui i.e. Ueqiv = (U1+U2+U3)/3

# Replace last . with number of unfound hydrogen atoms attached to an atom.

# ..._refinement_flags_... 
# . no refinement constraints           S special position constraint on site
# G rigid group refinement of site      R riding atom
# D distance or angle restraint on site T thermal displacement constraints
# U Uiso or Uij restraint (rigid bond)  P partial occupancy constraint

loop_
_atom_site_label
_atom_site_type_symbol
_atom_site_fract_x
_atom_site_fract_y
_atom_site_fract_z
_atom_site_U_iso_or_equiv
_atom_site_occupancy
_atom_site_adp_type
_atom_site_refinement_flags_posn
_atom_site_refinement_flags_adp
_atom_site_refinement_flags_occupancy
_atom_site_disorder_assembly
_atom_site_disorder_group
_atom_site_attached_hydrogens
O1 O 0.38424(14) 0.1035(3) 0.45924(12) 0.0266 1.0000 Uani . . . . . . 
C2 C 0.3265(2) 0.2656(4) 0.40275(17) 0.0235 1.0000 Uani . . . . . . 
C3 C 0.2068(2) 0.2067(4) 0.36026(19) 0.0304 1.0000 Uani . . . . . . 
C4 C 0.1630(2) 0.0394(5) 0.3776(2) 0.0359 1.0000 Uani . . . . . . 
C5 C 0.37534(18) 0.3223(4) 0.32402(17) 0.0214 1.0000 Uani . . . . . . 
O6 O 0.49319(13) 0.3353(3) 0.36302(12) 0.0239 1.0000 Uani . . . . . . 
C7 C 0.5508(2) 0.1613(4) 0.34945(19) 0.0274 1.0000 Uani . . . . . . 
C8 C 0.6719(2) 0.2117(5) 0.37156(17) 0.0282 1.0000 Uani . . . . . . 
C9 C 0.7057(3) 0.4037(5) 0.3585(2) 0.0392 1.0000 Uani . . . . . . 
C10 C 0.8167(3) 0.4425(6) 0.3729(3) 0.0514 1.0000 Uani . . . . . . 
C11 C 0.8935(3) 0.2907(6) 0.3996(2) 0.0556 1.0000 Uani . . . . . . 
C12 C 0.8602(3) 0.0984(6) 0.4136(2) 0.0545 1.0000 Uani . . . . . . 
C13 C 0.7491(2) 0.0582(5) 0.3997(2) 0.0405 1.0000 Uani . . . . . . 
C14 C 0.32898(19) 0.5251(4) 0.27584(16) 0.0215 1.0000 Uani . . . . . . 
N15 N 0.30537(16) 0.5140(3) 0.17135(14) 0.0228 1.0000 Uani . . . . . . 
C16 C 0.4019(2) 0.5437(4) 0.14143(17) 0.0283 1.0000 Uani . . . . . . 
C17 C 0.3789(2) 0.4802(4) 0.03885(19) 0.0290 1.0000 Uani . . . . . . 
C18 C 0.3485(2) 0.2848(4) 0.0110(2) 0.0373 1.0000 Uani . . . . . . 
C19 C 0.3261(3) 0.2263(6) -0.0846(2) 0.0477 1.0000 Uani . . . . . . 
C20 C 0.3346(3) 0.3656(6) -0.1500(2) 0.0509 1.0000 Uani . . . . . . 
C21 C 0.3642(3) 0.5597(6) -0.1235(2) 0.0487 1.0000 Uani . . . . . . 
C22 C 0.3874(2) 0.6173(5) -0.0287(2) 0.0370 1.0000 Uani . . . . . . 
C23 C 0.2051(2) 0.6210(4) 0.11208(18) 0.0261 1.0000 Uani . . . . . . 
C24 C 0.1049(2) 0.5287(4) 0.12953(17) 0.0268 1.0000 Uani . . . . . . 
C25 C 0.0777(2) 0.3314(4) 0.10050(19) 0.0315 1.0000 Uani . . . . . . 
C26 C -0.0101(2) 0.2361(5) 0.1172(2) 0.0410 1.0000 Uani . . . . . . 
C27 C -0.0726(2) 0.3374(6) 0.1620(2) 0.0495 1.0000 Uani . . . . . . 
C28 C -0.0479(3) 0.5339(6) 0.1893(2) 0.0536 1.0000 Uani . . . . . . 
C29 C 0.0402(2) 0.6304(5) 0.1723(2) 0.0387 1.0000 Uani . . . . . . 
C30 C 0.2097(3) 0.8503(4) 0.1184(2) 0.0395 1.0000 Uani . . . . . . 
C31 C 0.4021(2) 0.7032(4) 0.32291(17) 0.0257 1.0000 Uani . . . . . . 
O32 O 0.41341(14) 0.7127(3) 0.42280(12) 0.0286 1.0000 Uani . . . . . . 
H21 H 0.3304 0.3897 0.4414 0.0375 1.0000 Uiso R . . . . . 
H31 H 0.1602 0.2975 0.3167 0.0445 1.0000 Uiso R . . . . . 
H42 H 0.2074 -0.0571 0.4197 0.0505 1.0000 Uiso R . . . . . 
H41 H 0.0866 0.0102 0.3472 0.0501 1.0000 Uiso R . . . . . 
H51 H 0.3541 0.2115 0.2759 0.0330 1.0000 Uiso R . . . . . 
H71 H 0.5423 0.0515 0.3911 0.0414 1.0000 Uiso R . . . . . 
H72 H 0.5210 0.1150 0.2803 0.0436 1.0000 Uiso R . . . . . 
H91 H 0.6521 0.5080 0.3389 0.0571 1.0000 Uiso R . . . . . 
H101 H 0.8395 0.5745 0.3647 0.0685 1.0000 Uiso R . . . . . 
H111 H 0.9679 0.3182 0.4090 0.0772 1.0000 Uiso R . . . . . 
H121 H 0.9129 -0.0052 0.4335 0.0798 1.0000 Uiso R . . . . . 
H131 H 0.7252 -0.0740 0.4065 0.0556 1.0000 Uiso R . . . . . 
H141 H 0.2578 0.5449 0.2882 0.0297 1.0000 Uiso R . . . . . 
H161 H 0.4222 0.6875 0.1445 0.0357 1.0000 Uiso R . . . . . 
H162 H 0.4643 0.4636 0.1834 0.0364 1.0000 Uiso R . . . . . 
H181 H 0.3432 0.1895 0.0562 0.0493 1.0000 Uiso R . . . . . 
H191 H 0.3037 0.0928 -0.1038 0.0624 1.0000 Uiso R . . . . . 
H201 H 0.3213 0.3271 -0.2147 0.0686 1.0000 Uiso R . . . . . 
H211 H 0.3688 0.6575 -0.1698 0.0647 1.0000 Uiso R . . . . . 
H221 H 0.4093 0.7543 -0.0108 0.0514 1.0000 Uiso R . . . . . 
H231 H 0.1975 0.5850 0.0442 0.0390 1.0000 Uiso R . . . . . 
H251 H 0.1213 0.2637 0.0701 0.0455 1.0000 Uiso R . . . . . 
H261 H -0.0271 0.0995 0.0977 0.0556 1.0000 Uiso R . . . . . 
H271 H -0.1323 0.2729 0.1738 0.0646 1.0000 Uiso R . . . . . 
H281 H -0.0904 0.6035 0.2201 0.0703 1.0000 Uiso R . . . . . 
H291 H 0.0560 0.7670 0.1904 0.0499 1.0000 Uiso R . . . . . 
H302 H 0.1418 0.9046 0.0753 0.0739 1.0000 Uiso R . . . . . 
H301 H 0.2728 0.9008 0.1034 0.0738 1.0000 Uiso R . . . . . 
H303 H 0.2149 0.8944 0.1815 0.0747 1.0000 Uiso R . . . . . 
H311 H 0.4745 0.6868 0.3137 0.0377 1.0000 Uiso R . . . . . 
H312 H 0.3681 0.8299 0.2931 0.0368 1.0000 Uiso R . . . . . 
H321 H 0.4004 0.8284 0.4386 0.0504 1.0000 Uiso R . . . . . 
H11 H 0.4501 0.1319 0.4896 0.0507 1.0000 Uiso R . . . . . 
loop_
_atom_site_aniso_label
_atom_site_aniso_U_11
_atom_site_aniso_U_22
_atom_site_aniso_U_33
_atom_site_aniso_U_23
_atom_site_aniso_U_13
_atom_site_aniso_U_12
O1 0.0254(8) 0.0253(9) 0.0271(9) 0.0038(7) 0.0061(7) 0.0008(7) 
C2 0.0251(12) 0.0227(12) 0.0225(13) 0.0029(10) 0.0078(10) 0.0015(10) 
C3 0.0243(13) 0.0367(15) 0.0316(14) 0.0073(12) 0.0109(11) 0.0027(12) 
C4 0.0272(13) 0.0412(16) 0.0397(16) 0.0014(14) 0.0116(12) -0.0035(13) 
C5 0.0181(11) 0.0239(12) 0.0207(12) -0.0001(10) 0.0046(9) -0.0013(10) 
O6 0.0190(8) 0.0235(9) 0.0280(9) -0.0028(8) 0.0064(7) 0.0005(7) 
C7 0.0252(13) 0.0261(14) 0.0330(14) -0.0036(11) 0.0126(11) 0.0026(10) 
C8 0.0231(12) 0.0422(15) 0.0202(13) -0.0047(12) 0.0083(10) 0.0026(12) 
C9 0.0323(15) 0.0449(17) 0.0467(19) -0.0104(14) 0.0215(14) -0.0048(13) 
C10 0.0387(18) 0.063(2) 0.062(2) -0.0191(18) 0.0293(16) -0.0152(16) 
C11 0.0257(15) 0.089(3) 0.055(2) -0.019(2) 0.0173(15) -0.0069(17) 
C12 0.0301(15) 0.086(3) 0.0469(19) -0.0011(19) 0.0122(14) 0.0188(18) 
C13 0.0343(15) 0.055(2) 0.0337(16) 0.0064(14) 0.0136(12) 0.0114(14) 
C14 0.0230(11) 0.0247(12) 0.0160(11) 0.0016(10) 0.0054(9) -0.0007(10) 
N15 0.0234(10) 0.0275(11) 0.0177(9) 0.0008(9) 0.0070(8) -0.0014(9) 
C16 0.0275(12) 0.0373(15) 0.0198(12) 0.0018(11) 0.0073(10) -0.0057(12) 
C17 0.0231(12) 0.0380(15) 0.0272(14) 0.0037(12) 0.0100(10) 0.0025(11) 
C18 0.0394(15) 0.0390(17) 0.0319(15) -0.0008(12) 0.0096(13) -0.0014(13) 
C19 0.0423(17) 0.0501(19) 0.0485(19) -0.0154(16) 0.0122(14) -0.0012(16) 
C20 0.0474(19) 0.079(3) 0.0274(16) -0.0040(17) 0.0140(14) 0.0121(18) 
C21 0.0518(18) 0.068(2) 0.0323(16) 0.0097(16) 0.0221(14) 0.0081(17) 
C22 0.0387(15) 0.0460(16) 0.0322(15) 0.0072(13) 0.0195(13) 0.0018(14) 
C23 0.0273(13) 0.0246(12) 0.0249(13) 0.0023(11) 0.0067(11) -0.0004(11) 
C24 0.0219(11) 0.0316(13) 0.0231(12) 0.0045(11) 0.0023(9) 0.0037(11) 
C25 0.0271(12) 0.0326(14) 0.0312(14) 0.0033(12) 0.0048(11) -0.0006(12) 
C26 0.0306(14) 0.0459(17) 0.0379(16) 0.0074(14) -0.0004(12) -0.0104(14) 
C27 0.0270(14) 0.077(2) 0.0412(18) 0.0115(18) 0.0071(13) -0.0095(17) 
C28 0.0351(16) 0.080(3) 0.052(2) 0.003(2) 0.0226(15) 0.0084(18) 
C29 0.0352(15) 0.0461(17) 0.0342(16) 0.0001(14) 0.0108(12) 0.0061(13) 
C30 0.0410(16) 0.0278(15) 0.0432(17) 0.0069(13) 0.0051(13) 0.0020(13) 
C31 0.0305(13) 0.0254(13) 0.0187(12) 0.0021(10) 0.0046(10) 0.0003(11) 
O32 0.0355(10) 0.0233(9) 0.0228(9) -0.0045(7) 0.0040(7) 0.0021(8) 

_refine_ls_extinction_method 
    'None'
_oxford_refine_ls_scale 6.96(15) 
loop_
 _geom_bond_atom_site_label_1
 _geom_bond_site_symmetry_1
 _geom_bond_atom_site_label_2
 _geom_bond_site_symmetry_2
 _geom_bond_distance
 _geom_bond_publ_flag
O1 . C2 . 1.416(3)    yes
O1 . H11 . 0.838    no
C2 . C3 . 1.508(3)    yes
C2 . C5 . 1.546(3)    yes
C2 . H21 . 0.998    no
C3 . C4 . 1.311(4)    yes
C3 . H31 . 0.941    no
C4 . H42 . 0.944    no
C4 . H41 . 0.953    no
C5 . O6 . 1.433(3)    yes
C5 . C14 . 1.551(3)    yes
C5 . H51 . 1.000    no
O6 . C7 . 1.424(3)    yes
C7 . C8 . 1.516(3)    yes
C7 . H71 . 0.986    no
C7 . H72 . 1.018    no
C8 . C9 . 1.383(4)    yes
C8 . C13 . 1.388(4)    yes
C9 . C10 . 1.394(4)    yes
C9 . H91 . 0.952    no
C10 . C11 . 1.375(5)    yes
C10 . H101 . 0.946    no
C11 . C12 . 1.386(6)    yes
C11 . H111 . 0.937    no
C12 . C13 . 1.398(4)    yes
C12 . H121 . 0.942    no
C13 . H131 . 0.948    no
C14 . N15 . 1.482(3)    yes
C14 . C31 . 1.529(3)    yes
C14 . H141 . 0.998    no
N15 . C16 . 1.462(3)    yes
N15 . C23 . 1.479(3)    yes
C16 . C17 . 1.514(4)    yes
C16 . H161 . 0.989    no
C16 . H162 . 0.992    no
C17 . C18 . 1.381(4)    yes
C17 . C22 . 1.386(4)    yes
C18 . C19 . 1.407(4)    yes
C18 . H181 . 0.942    no
C19 . C20 . 1.374(5)    yes
C19 . H191 . 0.948    no
C20 . C21 . 1.366(5)    yes
C20 . H201 . 0.954    no
C21 . C22 . 1.395(4)    yes
C21 . H211 . 0.962    no
C22 . H221 . 0.965    no
C23 . C24 . 1.524(4)    yes
C23 . C30 . 1.528(4)    yes
C23 . H231 . 1.010    no
C24 . C25 . 1.389(4)    yes
C24 . C29 . 1.380(4)    yes
C25 . C26 . 1.386(4)    yes
C25 . H251 . 0.942    no
C26 . C27 . 1.376(5)    yes
C26 . H261 . 0.957    no
C27 . C28 . 1.374(6)    yes
C27 . H271 . 0.945    no
C28 . C29 . 1.395(4)    yes
C28 . H281 . 0.943    no
C29 . H291 . 0.950    no
C30 . H302 . 0.965    no
C30 . H301 . 0.969    no
C30 . H303 . 0.962    no
C31 . O32 . 1.444(3)    yes
C31 . H311 . 0.989    no
C31 . H312 . 0.984    no
O32 . H321 . 0.838    no
loop_
 _geom_angle_atom_site_label_1
 _geom_angle_site_symmetry_1
 _geom_angle_atom_site_label_2
 _geom_angle_site_symmetry_2
 _geom_angle_atom_site_label_3
 _geom_angle_site_symmetry_3
 _geom_angle
 _geom_angle_publ_flag
C2 . O1 . H11 . 112.6    no
O1 . C2 . C3 . 108.1(2)    yes
O1 . C2 . C5 . 111.75(19)    yes
C3 . C2 . C5 . 111.1(2)    yes
O1 . C2 . H21 . 111.9    no
C3 . C2 . H21 . 107.8    no
C5 . C2 . H21 . 106.2    no
C2 . C3 . C4 . 125.7(3)    yes
C2 . C3 . H31 . 116.6    no
C4 . C3 . H31 . 117.7    no
C3 . C4 . H42 . 120.2    no
C3 . C4 . H41 . 121.4    no
H42 . C4 . H41 . 118.4    no
C2 . C5 . O6 . 110.33(18)    yes
C2 . C5 . C14 . 111.82(19)    yes
O6 . C5 . C14 . 109.06(19)    yes
C2 . C5 . H51 . 106.2    no
O6 . C5 . H51 . 109.6    no
C14 . C5 . H51 . 109.8    no
C5 . O6 . C7 . 114.99(18)    yes
O6 . C7 . C8 . 109.5(2)    yes
O6 . C7 . H71 . 110.0    no
C8 . C7 . H71 . 110.3    no
O6 . C7 . H72 . 110.4    no
C8 . C7 . H72 . 107.6    no
H71 . C7 . H72 . 109.0    no
C7 . C8 . C9 . 121.4(2)    yes
C7 . C8 . C13 . 118.8(3)    yes
C9 . C8 . C13 . 119.7(3)    yes
C8 . C9 . C10 . 120.2(3)    yes
C8 . C9 . H91 . 119.2    no
C10 . C9 . H91 . 120.7    no
C9 . C10 . C11 . 120.5(3)    yes
C9 . C10 . H101 . 119.8    no
C11 . C10 . H101 . 119.7    no
C10 . C11 . C12 . 119.6(3)    yes
C10 . C11 . H111 . 119.9    no
C12 . C11 . H111 . 120.5    no
C11 . C12 . C13 . 120.3(3)    yes
C11 . C12 . H121 . 119.8    no
C13 . C12 . H121 . 119.9    no
C12 . C13 . C8 . 119.7(3)    yes
C12 . C13 . H131 . 120.8    no
C8 . C13 . H131 . 119.4    no
C5 . C14 . N15 . 110.75(19)    yes
C5 . C14 . C31 . 112.29(18)    yes
N15 . C14 . C31 . 113.53(19)    yes
C5 . C14 . H141 . 105.3    no
N15 . C14 . H141 . 108.5    no
C31 . C14 . H141 . 105.9    no
C14 . N15 . C16 . 114.35(18)    yes
C14 . N15 . C23 . 115.80(19)    yes
C16 . N15 . C23 . 114.33(19)    yes
N15 . C16 . C17 . 111.5(2)    yes
N15 . C16 . H161 . 110.7    no
C17 . C16 . H161 . 106.1    no
N15 . C16 . H162 . 109.0    no
C17 . C16 . H162 . 109.4    no
H161 . C16 . H162 . 110.2    no
C16 . C17 . C18 . 120.4(2)    yes
C16 . C17 . C22 . 120.6(3)    yes
C18 . C17 . C22 . 119.0(3)    yes
C17 . C18 . C19 . 120.4(3)    yes
C17 . C18 . H181 . 120.0    no
C19 . C18 . H181 . 119.6    no
C18 . C19 . C20 . 119.3(3)    yes
C18 . C19 . H191 . 120.3    no
C20 . C19 . H191 . 120.3    no
C19 . C20 . C21 . 120.9(3)    yes
C19 . C20 . H201 . 120.1    no
C21 . C20 . H201 . 118.9    no
C20 . C21 . C22 . 119.8(3)    yes
C20 . C21 . H211 . 120.7    no
C22 . C21 . H211 . 119.6    no
C21 . C22 . C17 . 120.6(3)    yes
C21 . C22 . H221 . 118.9    no
C17 . C22 . H221 . 120.5    no
N15 . C23 . C24 . 108.8(2)    yes
N15 . C23 . C30 . 115.8(2)    yes
C24 . C23 . C30 . 114.1(2)    yes
N15 . C23 . H231 . 105.0    no
C24 . C23 . H231 . 105.4    no
C30 . C23 . H231 . 106.7    no
C23 . C24 . C25 . 117.9(2)    yes
C23 . C24 . C29 . 123.5(3)    yes
C25 . C24 . C29 . 118.6(3)    yes
C24 . C25 . C26 . 120.8(3)    yes
C24 . C25 . H251 . 118.2    no
C26 . C25 . H251 . 121.0    no
C25 . C26 . C27 . 120.1(3)    yes
C25 . C26 . H261 . 119.8    no
C27 . C26 . H261 . 120.1    no
C26 . C27 . C28 . 119.6(3)    yes
C26 . C27 . H271 . 120.4    no
C28 . C27 . H271 . 119.9    no
C27 . C28 . C29 . 120.4(3)    yes
C27 . C28 . H281 . 119.8    no
C29 . C28 . H281 . 119.8    no
C28 . C29 . C24 . 120.4(3)    yes
C28 . C29 . H291 . 119.9    no
C24 . C29 . H291 . 119.7    no
C23 . C30 . H302 . 109.0    no
C23 . C30 . H301 . 110.5    no
H302 . C30 . H301 . 110.9    no
C23 . C30 . H303 . 110.7    no
H302 . C30 . H303 . 106.8    no
H301 . C30 . H303 . 109.0    no
C14 . C31 . O32 . 109.95(19)    yes
C14 . C31 . H311 . 108.3    no
O32 . C31 . H311 . 111.6    no
C14 . C31 . H312 . 110.1    no
O32 . C31 . H312 . 107.7    no
H311 . C31 . H312 . 109.2    no
C31 . O32 . H321 . 111.5    no
loop_
 _geom_hbond_atom_site_label_D
 _geom_hbond_site_symmetry_D
 _geom_hbond_atom_site_label_H
 _geom_hbond_site_symmetry_H
 _geom_hbond_atom_site_label_A
 _geom_hbond_site_symmetry_A
 _geom_hbond_angle_DHA
 _geom_hbond_distance_DH
 _geom_hbond_distance_HA
 _geom_hbond_distance_DA
 _geom_hbond_publ_flag
C2 . H21 . O32 . 126.88(7) 0.998 2.454 3.155(4)    yes
O32 . H321 . O1 1_565 169.81(7) 0.838 1.878 2.707(4)    yes
O1 . H11 . O32 2_646 168.34(8) 0.838 1.882 2.708(4)    yes

#==============================================================================
data_19.CHCl3  
_ccdc_journal_depnumber            '926153'
#==============================================================================

_cell_length_a                    11.1676(4)
_cell_length_b                    8.2551(3)
_cell_length_c                    12.4524(5)
_cell_angle_alpha                 90
_cell_angle_beta                  90.8174(16)
_cell_angle_gamma                 90
_cell_volume                      1147.87(7)
 
_symmetry_cell_setting            'Monoclinic' 
_symmetry_space_group_name_H-M    'P 1 21 1' 
_symmetry_space_group_name_Hall   'P 2yb' 
loop_
 _symmetry_equiv_pos_as_xyz
 'x,y,z'
 '-x,y+1/2,-z'

loop_
_atom_type_symbol
_atom_type_scat_dispersion_real
_atom_type_scat_dispersion_imag
_atom_type_scat_Cromer_Mann_a1
_atom_type_scat_Cromer_Mann_b1
_atom_type_scat_Cromer_Mann_a2
_atom_type_scat_Cromer_Mann_b2
_atom_type_scat_Cromer_Mann_a3
_atom_type_scat_Cromer_Mann_b3
_atom_type_scat_Cromer_Mann_a4
_atom_type_scat_Cromer_Mann_b4
_atom_type_scat_Cromer_Mann_c
_atom_type_scat_source  
 C       0.0033   0.0016   2.3100  20.8439   1.0200  10.2075   1.5886   0.5687
   0.8650  51.6512   0.2156 'International Tables Vol C 4.2.6.8 and 6.1.1.4'
 H       0.0000   0.0000   0.4930  10.5109   0.3229  26.1257   0.1402   3.1424
   0.0408  57.7998   0.0030 'International Tables Vol C 4.2.6.8 and 6.1.1.4'
 Cl      0.1484   0.1585  11.4604   0.0104   7.1964   1.1662   6.2556  18.5194
   1.6455  47.7784  -9.5574 'International Tables Vol C 4.2.6.8 and 6.1.1.4'
 N       0.0061   0.0033  12.2126   0.0057   3.1322   9.8933   2.0125  28.9975
   1.1663   0.5826 -11.5290 'International Tables Vol C 4.2.6.8 and 6.1.1.4'
 O       0.0106   0.0060   3.0485  13.2771   2.2868   5.7011   1.5463   0.3239
   0.8670  32.9089   0.2508 'International Tables Vol C 4.2.6.8 and 6.1.1.4'
 
_cell_formula_units_Z                    2

# Given Formula = C21 H28 Cl3 N1 O4 
# Dc =      1.34 Fooo =    484.00 Mu =      4.26 M =    464.82
# Found Formula = C21 H26 Cl3 N1 O4 
# Dc =      1.34 FOOO =    484.00 Mu =      4.25 M =    462.80

_chemical_formula_sum             'C21 H26 Cl3 N1 O4'
_chemical_formula_moiety          'C21 H26 Cl3 N1 O4'
_chemical_compound_source                .
_chemical_formula_weight            462.80
 
_cell_measurement_reflns_used         2713
_cell_measurement_theta_min              5
_cell_measurement_theta_max             27
_cell_measurement_temperature          150
 
_exptl_crystal_description        'block' 
_exptl_crystal_colour             'colourless' 
_exptl_crystal_size_min           0.230 
_exptl_crystal_size_mid           0.260 
_exptl_crystal_size_max           0.270 
 
_exptl_crystal_density_diffrn     1.339 
_exptl_crystal_density_meas       . 
_exptl_crystal_density_method     'not measured' 
# Non-dispersive F(000): 
_exptl_crystal_F_000              484 
_exptl_absorpt_coefficient_mu     0.425 
 
# Sheldrick geometric approximatio 0.90 0.91 
# No experimental values of Tmin/max available 
_exptl_absorpt_correction_type    multi-scan 
_exptl_absorpt_process_details    'DENZO/SCALEPACK (Otwinowski & Minor, 1997)' 
_exptl_absorpt_correction_T_min   0.90 
_exptl_absorpt_correction_T_max   0.91 
# For a Kappa CCD, set Tmin to 1.0 and 
# Tmax to the ratio of max:min frame scales in scale_all.log 
_diffrn_measurement_device_type   'Nonius KappaCCD' 
_diffrn_measurement_device        'Area' 
_diffrn_radiation_monochromator   'graphite' 
_diffrn_radiation_type            'Mo K\a'
_diffrn_radiation_wavelength           0.71073
_diffrn_measurement_method        \w 
 
# If a reference occurs more than once, delete the author 
# and date from subsequent references. 
_computing_data_collection        'COLLECT (Nonius, 2001).' 
_computing_cell_refinement        'DENZO/SCALEPACK (Otwinowski & Minor, 1997)' 
_computing_data_reduction         'DENZO/SCALEPACK (Otwinowski & Minor, 1997)' 
_computing_structure_solution     'SIR92 (Altomare et al., 1994)' 
_computing_structure_refinement   'CRYSTALS (Betteridge et al., 2003)' 
_computing_publication_material   'CRYSTALS (Betteridge et al., 2003)' 
_computing_molecular_graphics     'CAMERON (Watkin et al., 1996)' 
 
_diffrn_standards_interval_time   . 
_diffrn_standards_interval_count  . 
_diffrn_standards_number          0 
_diffrn_standards_decay_%         . 
 
_diffrn_ambient_temperature        150
_diffrn_reflns_number             5050 
_reflns_number_total              5050 
_diffrn_reflns_av_R_equivalents   0.000 
# Number of reflections without Friedels Law is 5050 
# Number of reflections with Friedels Law is 2789 
# Theoretical number of reflections is about 2606 
 
_diffrn_reflns_theta_min          5.204 
_diffrn_reflns_theta_max          27.480 
_diffrn_measured_fraction_theta_max 0.991 
 
_diffrn_reflns_theta_full         27.480 
_diffrn_measured_fraction_theta_full 0.991 
 
_diffrn_reflns_limit_h_min        -14 
_diffrn_reflns_limit_h_max        14 
_diffrn_reflns_limit_k_min        -10 
_diffrn_reflns_limit_k_max        10 
_diffrn_reflns_limit_l_min        -16 
_diffrn_reflns_limit_l_max        16 
_reflns_limit_h_min               -14 
_reflns_limit_h_max               14 
_reflns_limit_k_min               -10 
_reflns_limit_k_max               10 
_reflns_limit_l_min               0 
_reflns_limit_l_max               16 
 
_oxford_diffrn_Wilson_B_factor    4.23 
_oxford_diffrn_Wilson_scale       6.24 
 
_atom_sites_solution_primary      Direct #heavy,direct,difmap,geom
# _atom_sites_solution_secondary  difmap
_atom_sites_solution_hydrogens    difmap
 
_refine_diff_density_min          -0.39 
_refine_diff_density_max          0.42 
 
# The current dictionary definitions do not cover the 
# situation where the reflections used for refinement were 
# selected by a user-defined sigma threshold 
 
# The values actually used during refinement 
_oxford_reflns_threshold_expression_ref     I>3.0\s(I)
_refine_ls_number_reflns          2656 
_refine_ls_number_restraints      1 
_refine_ls_number_parameters      263 
_oxford_refine_ls_R_factor_ref    0.0508 
_refine_ls_wR_factor_ref          0.0622 
_refine_ls_goodness_of_fit_ref    1.0257 
_refine_ls_shift/su_max           0.0000987 
_refine_ls_shift/su_mean          0.0000103 
 
# The values computed from all data 
_oxford_reflns_number_all         5050 
_refine_ls_R_factor_all           0.1118 
_refine_ls_wR_factor_all          0.0998 
 
# The values computed with a 2 sigma cutoff - a la SHELX 
_reflns_threshold_expression      I>2.0\s(I)
_reflns_number_gt                 3081 
_refine_ls_R_factor_gt            0.0604 
_refine_ls_wR_factor_gt           0.0697 
 
_refine_ls_abs_structure_Flack    -0.09(12) 
_refine_ls_abs_structure_details  'Flack (1983), 2261 Friedel-pairs' 
# choose from: rm (reference molecule of known chirality), 
# ad (anomolous dispersion - Flack), rmad (rm and ad), 
# syn (from synthesis), unk (unknown) or . (not applicable). 
_chemical_absolute_configuration  'ad' 
 
_refine_ls_structure_factor_coef  F 
_refine_ls_matrix_type            full
_refine_ls_hydrogen_treatment     constr         # none, undef, noref, refall,
                                                 # refxyz, refU, constr or mixed
_refine_ls_weighting_scheme       calc 
_refine_ls_weighting_details 
;
 Method= Modified Sheldrick 
 w=1/[\s^2^(F) + ( 0.01P)^2^ + 0.04P] 
 ,where P=(max(Fo,0) + 2Fc)/3 
;
# Insert your own references if required - in alphabetical order 
_publ_section_references 
; 
Nonius (2001). COLLECT. Nonius BV, Delft, The Netherlands. 
 
Otwinowski, Z. & Minor, W. (1997). Methods in Enzymology, Vol. 276, 
edited by C. W. Carter Jr & R. M. Sweet, pp. 307--326. 
New York: Academic Press. 
 
Betteridge, P.W., Carruthers, J.R., Cooper, R.I., 
Prout, K. & Watkin, D.J. (2003). J. Appl. Cryst. 36, 1487. 
 
Watkin, D.J., Prout, C.K. & Pearce, L.J. (1996). CAMERON, Chemical 
Crystallography Laboratory, Oxford, UK. 
 
Altomare, A., Cascarano, G., Giacovazzo, C., Guagliardi, A., Burla, M.C., 
Polidori, G. & Camalli, M. (1994). J. Appl. Cryst. 27, 435. 
 
Flack, H. D. (1983). Acta Cryst. A39, 876-881. 
; 

# Uequiv = arithmetic mean of Ui i.e. Ueqiv = (U1+U2+U3)/3

# Replace last . with number of unfound hydrogen atoms attached to an atom.

# ..._refinement_flags_... 
# . no refinement constraints           S special position constraint on site
# G rigid group refinement of site      R riding atom
# D distance or angle restraint on site T thermal displacement constraints
# U Uiso or Uij restraint (rigid bond)  P partial occupancy constraint

loop_
_atom_site_label
_atom_site_type_symbol
_atom_site_fract_x
_atom_site_fract_y
_atom_site_fract_z
_atom_site_U_iso_or_equiv
_atom_site_occupancy
_atom_site_adp_type
_atom_site_refinement_flags_posn
_atom_site_refinement_flags_adp
_atom_site_refinement_flags_occupancy
_atom_site_disorder_assembly
_atom_site_disorder_group
_atom_site_attached_hydrogens
Cl1 Cl 0.72779(16) 0.3001(2) 0.17756(13) 0.0809 1.0000 Uani . . . . . . 
C2 C 0.8248(5) 0.4016(7) 0.0935(5) 0.0631 1.0000 Uani . . . . . . 
Cl3 Cl 0.9297(2) 0.5089(3) 0.1710(2) 0.1276 1.0000 Uani . . . . . . 
Cl4 Cl 0.8986(3) 0.2705(3) 0.00748(17) 0.1365 1.0000 Uani . . . . . . 
O5 O 0.4652(2) 0.7842(4) 0.2442(2) 0.0318 1.0000 Uani . . . . . . 
C6 C 0.4244(4) 0.7641(5) 0.3524(3) 0.0278 1.0000 Uani . . . . . . 
C7 C 0.4361(4) 0.9221(5) 0.4143(3) 0.0275 1.0000 Uani . . . . . . 
O8 O 0.5608(2) 0.9602(3) 0.4255(2) 0.0335 1.0000 Uani . . . . . . 
C9 C 0.3758(4) 0.9053(5) 0.5228(3) 0.0331 1.0000 Uani . . . . . . 
O10 O 0.4374(2) 0.7941(4) 0.5921(2) 0.0335 1.0000 Uani . . . . . . 
C11 C 0.2490(4) 0.8503(5) 0.5084(3) 0.0296 1.0000 Uani . . . . . . 
N12 N 0.2417(3) 0.6933(4) 0.4515(3) 0.0285 1.0000 Uani . . . . . . 
C13 C 0.2953(4) 0.7041(5) 0.3438(3) 0.0275 1.0000 Uani . . . . . . 
C14 C 0.2920(4) 0.5378(5) 0.2899(3) 0.0346 1.0000 Uani . . . . . . 
O15 O 0.3362(3) 0.4145(4) 0.3616(2) 0.0366 1.0000 Uani . . . . . . 
C16 C 0.1156(4) 0.6415(6) 0.4455(3) 0.0332 1.0000 Uani . . . . . . 
C17 C 0.0633(4) 0.6094(6) 0.5550(3) 0.0316 1.0000 Uani . . . . . . 
C18 C 0.1165(4) 0.5033(6) 0.6265(4) 0.0387 1.0000 Uani . . . . . . 
C19 C 0.0641(5) 0.4708(7) 0.7249(4) 0.0490 1.0000 Uani . . . . . . 
C20 C -0.0421(5) 0.5483(7) 0.7524(4) 0.0476 1.0000 Uani . . . . . . 
C21 C -0.0946(5) 0.6537(6) 0.6815(4) 0.0507 1.0000 Uani . . . . . . 
C22 C -0.0425(4) 0.6846(6) 0.5837(4) 0.0368 1.0000 Uani . . . . . . 
C23 C 0.5835(4) 0.7279(9) 0.2269(4) 0.0601 1.0000 Uani . . . . . . 
C24 C 0.6082(4) 0.7217(6) 0.1084(3) 0.0411 1.0000 Uani . . . . . . 
C25 C 0.6942(4) 0.8196(6) 0.0642(4) 0.0431 1.0000 Uani . . . . . . 
C26 C 0.7216(4) 0.8048(8) -0.0444(4) 0.0537 1.0000 Uani . . . . . . 
C27 C 0.6594(5) 0.7009(7) -0.1079(4) 0.0490 1.0000 Uani . . . . . . 
C28 C 0.5719(5) 0.6052(7) -0.0651(4) 0.0525 1.0000 Uani . . . . . . 
C29 C 0.5469(4) 0.6141(7) 0.0430(4) 0.0498 1.0000 Uani . . . . . . 
H21 H 0.7780 0.4781 0.0493 0.0799 1.0000 Uiso R . . . . . 
H61 H 0.4732 0.6812 0.3906 0.0335 1.0000 Uiso R . . . . . 
H71 H 0.3952 1.0072 0.3710 0.0344 1.0000 Uiso R . . . . . 
H91 H 0.3786 1.0131 0.5582 0.0394 1.0000 Uiso R . . . . . 
H112 H 0.2150 0.8389 0.5801 0.0364 1.0000 Uiso R . . . . . 
H111 H 0.2033 0.9294 0.4684 0.0366 1.0000 Uiso R . . . . . 
H131 H 0.2499 0.7802 0.2988 0.0349 1.0000 Uiso R . . . . . 
H142 H 0.3442 0.5411 0.2269 0.0424 1.0000 Uiso R . . . . . 
H141 H 0.2086 0.5115 0.2666 0.0417 1.0000 Uiso R . . . . . 
H161 H 0.0682 0.7259 0.4084 0.0399 1.0000 Uiso R . . . . . 
H162 H 0.1123 0.5420 0.4047 0.0395 1.0000 Uiso R . . . . . 
H181 H 0.1889 0.4546 0.6089 0.0494 1.0000 Uiso R . . . . . 
H191 H 0.0995 0.3962 0.7721 0.0602 1.0000 Uiso R . . . . . 
H201 H -0.0777 0.5283 0.8181 0.0598 1.0000 Uiso R . . . . . 
H211 H -0.1673 0.7072 0.7000 0.0598 1.0000 Uiso R . . . . . 
H221 H -0.0791 0.7572 0.5348 0.0461 1.0000 Uiso R . . . . . 
H231 H 0.6392 0.8034 0.2624 0.0785 1.0000 Uiso R . . . . . 
H232 H 0.5922 0.6198 0.2588 0.0784 1.0000 Uiso R . . . . . 
H251 H 0.7336 0.8957 0.1061 0.0543 1.0000 Uiso R . . . . . 
H261 H 0.7825 0.8684 -0.0718 0.0669 1.0000 Uiso R . . . . . 
H271 H 0.6755 0.6968 -0.1816 0.0622 1.0000 Uiso R . . . . . 
H281 H 0.5310 0.5311 -0.1091 0.0639 1.0000 Uiso R . . . . . 
H291 H 0.4872 0.5498 0.0703 0.0611 1.0000 Uiso R . . . . . 
H101 H 0.5012 0.8360 0.6084 0.0517 1.0000 Uiso R . . . . . 
H81 H 0.5676 1.0585 0.4350 0.0531 1.0000 Uiso R . . . . . 
H151 H 0.3263 0.4519 0.4236 0.0588 1.0000 Uiso R . . . . . 
loop_
_atom_site_aniso_label
_atom_site_aniso_U_11
_atom_site_aniso_U_22
_atom_site_aniso_U_33
_atom_site_aniso_U_23
_atom_site_aniso_U_13
_atom_site_aniso_U_12
Cl1 0.0904(12) 0.0698(10) 0.0830(11) 0.0269(10) 0.0170(9) 0.0019(9) 
C2 0.070(4) 0.065(4) 0.056(4) 0.013(3) 0.019(3) 0.018(3) 
Cl3 0.0957(14) 0.0901(15) 0.196(3) 0.0221(17) -0.0393(16) -0.0023(13) 
Cl4 0.196(2) 0.128(2) 0.0871(13) 0.0259(14) 0.0529(15) 0.089(2) 
O5 0.0303(15) 0.0423(17) 0.0229(14) -0.0002(15) 0.0068(12) 0.0049(15) 
C6 0.028(2) 0.034(3) 0.022(2) -0.0018(18) 0.0044(17) 0.0073(19) 
C7 0.030(2) 0.024(2) 0.028(2) 0.0038(19) 0.0064(19) -0.0030(19) 
O8 0.0318(16) 0.0307(17) 0.0383(18) 0.0007(14) 0.0054(13) -0.0065(14) 
C9 0.044(3) 0.023(2) 0.033(2) -0.0029(19) 0.001(2) 0.003(2) 
O10 0.0340(15) 0.0340(16) 0.0325(15) 0.0010(15) 0.0001(12) -0.0053(15) 
C11 0.030(2) 0.028(2) 0.031(2) -0.0049(18) 0.0076(19) 0.0047(18) 
N12 0.0257(18) 0.0294(19) 0.0305(19) -0.0047(16) 0.0037(15) -0.0018(15) 
C13 0.028(2) 0.031(2) 0.024(2) -0.0006(19) 0.0074(17) 0.0039(19) 
C14 0.033(2) 0.040(3) 0.031(2) -0.003(2) 0.002(2) -0.001(2) 
O15 0.0371(17) 0.0333(18) 0.0395(18) -0.0050(15) 0.0026(14) 0.0001(15) 
C16 0.028(2) 0.038(3) 0.033(2) -0.002(2) 0.0010(19) 0.003(2) 
C17 0.032(2) 0.033(2) 0.030(2) -0.004(2) 0.0016(19) -0.006(2) 
C18 0.032(2) 0.047(3) 0.037(3) 0.000(2) 0.000(2) -0.001(2) 
C19 0.053(3) 0.055(3) 0.039(3) 0.007(2) -0.011(2) -0.015(3) 
C20 0.045(3) 0.059(3) 0.039(3) -0.002(3) 0.007(2) -0.019(3) 
C21 0.047(3) 0.044(3) 0.061(3) -0.011(3) 0.020(3) -0.009(3) 
C22 0.030(2) 0.034(2) 0.046(3) 0.002(2) 0.009(2) -0.003(2) 
C23 0.039(3) 0.115(5) 0.026(2) -0.008(3) 0.008(2) 0.019(3) 
C24 0.034(3) 0.064(4) 0.025(2) -0.003(2) 0.008(2) 0.007(2) 
C25 0.035(3) 0.045(3) 0.049(3) -0.006(3) -0.010(2) 0.000(2) 
C26 0.040(3) 0.069(4) 0.052(3) 0.026(3) 0.008(2) -0.009(3) 
C27 0.045(3) 0.074(4) 0.028(2) 0.003(3) 0.014(2) 0.004(3) 
C28 0.069(4) 0.052(3) 0.036(3) -0.011(3) 0.002(3) -0.008(3) 
C29 0.048(3) 0.066(3) 0.035(3) 0.002(3) 0.010(2) -0.019(3) 

_refine_ls_extinction_method 
    'None'
_oxford_refine_ls_scale 0.4361(11) 
loop_
 _geom_bond_atom_site_label_1
 _geom_bond_site_symmetry_1
 _geom_bond_atom_site_label_2
 _geom_bond_site_symmetry_2
 _geom_bond_distance
 _geom_bond_publ_flag
Cl1 . C2 . 1.733(6)    yes
C2 . Cl3 . 1.747(7)    yes
C2 . Cl4 . 1.739(6)    yes
C2 . H21 . 0.983    no
O5 . C6 . 1.437(4)    yes
O5 . C23 . 1.420(5)    yes
C6 . C7 . 1.520(6)    yes
C6 . C13 . 1.527(6)    yes
C6 . H61 . 0.992    no
C7 . O8 . 1.433(5)    yes
C7 . C9 . 1.524(6)    yes
C7 . H71 . 0.993    no
O8 . H81 . 0.823    no
C9 . O10 . 1.430(5)    yes
C9 . C11 . 1.496(6)    yes
C9 . H91 . 0.993    no
O10 . H101 . 0.815    no
C11 . N12 . 1.478(5)    yes
C11 . H112 . 0.980    no
C11 . H111 . 0.962    no
N12 . C13 . 1.479(5)    yes
N12 . C16 . 1.473(5)    yes
C13 . C14 . 1.528(6)    yes
C13 . H131 . 0.978    no
C14 . O15 . 1.437(5)    yes
C14 . H142 . 0.984    no
C14 . H141 . 0.995    no
O15 . H151 . 0.841    no
C16 . C17 . 1.514(6)    yes
C16 . H161 . 0.986    no
C16 . H162 . 0.966    no
C17 . C18 . 1.378(6)    yes
C17 . C22 . 1.387(6)    yes
C18 . C19 . 1.392(7)    yes
C18 . H181 . 0.932    no
C19 . C20 . 1.394(8)    yes
C19 . H191 . 0.935    no
C20 . C21 . 1.365(7)    yes
C20 . H201 . 0.930    no
C21 . C22 . 1.382(7)    yes
C21 . H211 . 0.955    no
C22 . H221 . 0.943    no
C23 . C24 . 1.505(6)    yes
C23 . H231 . 0.982    no
C23 . H232 . 0.981    no
C24 . C25 . 1.377(7)    yes
C24 . C29 . 1.380(7)    yes
C25 . C26 . 1.396(7)    yes
C25 . H251 . 0.924    no
C26 . C27 . 1.352(7)    yes
C26 . H261 . 0.928    no
C27 . C28 . 1.370(7)    yes
C27 . H271 . 0.939    no
C28 . C29 . 1.380(7)    yes
C28 . H281 . 0.936    no
C29 . H291 . 0.922    no
loop_
 _geom_angle_atom_site_label_1
 _geom_angle_site_symmetry_1
 _geom_angle_atom_site_label_2
 _geom_angle_site_symmetry_2
 _geom_angle_atom_site_label_3
 _geom_angle_site_symmetry_3
 _geom_angle
 _geom_angle_publ_flag
Cl1 . C2 . Cl3 . 109.4(3)    yes
Cl1 . C2 . Cl4 . 112.1(4)    yes
Cl3 . C2 . Cl4 . 109.6(3)    yes
Cl1 . C2 . H21 . 108.5    no
Cl3 . C2 . H21 . 109.3    no
Cl4 . C2 . H21 . 107.9    no
C6 . O5 . C23 . 114.4(3)    yes
O5 . C6 . C7 . 110.5(3)    yes
O5 . C6 . C13 . 106.4(3)    yes
C7 . C6 . C13 . 112.8(3)    yes
O5 . C6 . H61 . 110.4    no
C7 . C6 . H61 . 107.9    no
C13 . C6 . H61 . 108.7    no
C6 . C7 . O8 . 108.3(3)    yes
C6 . C7 . C9 . 109.6(3)    yes
O8 . C7 . C9 . 112.0(3)    yes
C6 . C7 . H71 . 107.2    no
O8 . C7 . H71 . 109.7    no
C9 . C7 . H71 . 109.9    no
C7 . O8 . H81 . 108.5    no
C7 . C9 . O10 . 112.2(3)    yes
C7 . C9 . C11 . 110.5(3)    yes
O10 . C9 . C11 . 108.9(3)    yes
C7 . C9 . H91 . 107.5    no
O10 . C9 . H91 . 107.2    no
C11 . C9 . H91 . 110.4    no
C9 . O10 . H101 . 106.8    no
C9 . C11 . N12 . 111.7(3)    yes
C9 . C11 . H112 . 107.3    no
N12 . C11 . H112 . 109.5    no
C9 . C11 . H111 . 110.4    no
N12 . C11 . H111 . 108.8    no
H112 . C11 . H111 . 109.1    no
C11 . N12 . C13 . 111.2(3)    yes
C11 . N12 . C16 . 109.0(3)    yes
C13 . N12 . C16 . 111.8(3)    yes
C6 . C13 . N12 . 110.5(3)    yes
C6 . C13 . C14 . 109.8(3)    yes
N12 . C13 . C14 . 109.7(3)    yes
C6 . C13 . H131 . 108.2    no
N12 . C13 . H131 . 110.1    no
C14 . C13 . H131 . 108.5    no
C13 . C14 . O15 . 111.0(3)    yes
C13 . C14 . H142 . 108.4    no
O15 . C14 . H142 . 108.2    no
C13 . C14 . H141 . 109.9    no
O15 . C14 . H141 . 109.7    no
H142 . C14 . H141 . 109.6    no
C14 . O15 . H151 . 105.2    no
N12 . C16 . C17 . 112.7(3)    yes
N12 . C16 . H161 . 108.9    no
C17 . C16 . H161 . 109.5    no
N12 . C16 . H162 . 107.6    no
C17 . C16 . H162 . 108.2    no
H161 . C16 . H162 . 109.8    no
C16 . C17 . C18 . 121.7(4)    yes
C16 . C17 . C22 . 119.7(4)    yes
C18 . C17 . C22 . 118.6(4)    yes
C17 . C18 . C19 . 120.6(4)    yes
C17 . C18 . H181 . 119.3    no
C19 . C18 . H181 . 120.1    no
C18 . C19 . C20 . 119.9(5)    yes
C18 . C19 . H191 . 120.0    no
C20 . C19 . H191 . 120.1    no
C19 . C20 . C21 . 119.5(5)    yes
C19 . C20 . H201 . 120.7    no
C21 . C20 . H201 . 119.8    no
C20 . C21 . C22 . 120.3(5)    yes
C20 . C21 . H211 . 119.8    no
C22 . C21 . H211 . 119.8    no
C17 . C22 . C21 . 121.1(5)    yes
C17 . C22 . H221 . 118.7    no
C21 . C22 . H221 . 120.2    no
O5 . C23 . C24 . 110.1(4)    yes
O5 . C23 . H231 . 108.0    no
C24 . C23 . H231 . 109.8    no
O5 . C23 . H232 . 108.9    no
C24 . C23 . H232 . 110.3    no
H231 . C23 . H232 . 109.7    no
C23 . C24 . C25 . 120.7(5)    yes
C23 . C24 . C29 . 120.3(5)    yes
C25 . C24 . C29 . 119.0(4)    yes
C24 . C25 . C26 . 120.0(4)    yes
C24 . C25 . H251 . 120.2    no
C26 . C25 . H251 . 119.8    no
C25 . C26 . C27 . 120.3(5)    yes
C25 . C26 . H261 . 118.6    no
C27 . C26 . H261 . 121.1    no
C26 . C27 . C28 . 120.1(4)    yes
C26 . C27 . H271 . 119.4    no
C28 . C27 . H271 . 120.5    no
C27 . C28 . C29 . 120.2(5)    yes
C27 . C28 . H281 . 119.6    no
C29 . C28 . H281 . 120.1    no
C28 . C29 . C24 . 120.3(5)    yes
C28 . C29 . H291 . 119.2    no
C24 . C29 . H291 . 120.5    no
loop_
 _geom_hbond_atom_site_label_D
 _geom_hbond_site_symmetry_D
 _geom_hbond_atom_site_label_H
 _geom_hbond_site_symmetry_H
 _geom_hbond_atom_site_label_A
 _geom_hbond_site_symmetry_A
 _geom_hbond_angle_DHA
 _geom_hbond_distance_DH
 _geom_hbond_distance_HA
 _geom_hbond_distance_DA
 _geom_hbond_publ_flag
O10 . H101 . O15 2_656 172.97(12) 0.815 1.959 2.770(7)    yes
O8 . H81 . O10 2_656 160.76(11) 0.823 1.974 2.765(7)    yes
O15 . H151 . O8 2_646 134.40(10) 0.841 2.248 2.899(7)    yes
O15 . H151 . N12 . 122.11(12) 0.841 2.235 2.775(7)    yes

#==============================================================================
data_25 
_ccdc_journal_depnumber            '926154'
#==============================================================================

_cell_length_a                    10.3223(3)
_cell_length_b                    6.9861(2)
_cell_length_c                    12.9927(3)
_cell_angle_alpha                 90
_cell_angle_beta                  101.708(3)
_cell_angle_gamma                 90
_cell_volume                      917.44(4)
 
_symmetry_cell_setting            'monoclinic' 
_symmetry_space_group_name_H-M    'P 1 21 1' 
_symmetry_space_group_name_Hall   'P 2yb' 
loop_
 _symmetry_equiv_pos_as_xyz
 'x,y,z'
 '-x,y+1/2,-z'

loop_
_atom_type_symbol
_atom_type_scat_dispersion_real
_atom_type_scat_dispersion_imag
_atom_type_scat_Cromer_Mann_a1
_atom_type_scat_Cromer_Mann_b1
_atom_type_scat_Cromer_Mann_a2
_atom_type_scat_Cromer_Mann_b2
_atom_type_scat_Cromer_Mann_a3
_atom_type_scat_Cromer_Mann_b3
_atom_type_scat_Cromer_Mann_a4
_atom_type_scat_Cromer_Mann_b4
_atom_type_scat_Cromer_Mann_c
_atom_type_scat_source  
 C       0.0181   0.0091   2.3100  20.8439   1.0200  10.2075   1.5886   0.5687
   0.8650  51.6512   0.2156 'International Tables Vol C 4.2.6.8 and 6.1.1.4'
 H       0.0000   0.0000   0.4930  10.5109   0.3229  26.1257   0.1402   3.1424
   0.0408  57.7998   0.0030 'International Tables Vol C 4.2.6.8 and 6.1.1.4'
 N       0.0311   0.0180  12.2126   0.0057   3.1322   9.8933   2.0125  28.9975
   1.1663   0.5826 -11.5290 'International Tables Vol C 4.2.6.8 and 6.1.1.4'
 O       0.0492   0.0322   3.0485  13.2771   2.2868   5.7011   1.5463   0.3239
   0.8670  32.9089   0.2508 'International Tables Vol C 4.2.6.8 and 6.1.1.4'
 
_cell_formula_units_Z                    2

# Given Formula = C20 H25 N1 O4 
# Dc =      1.24 Fooo =    368.00 Mu =      6.98 M =    343.42
# Found Formula = C20 H25 N1 O4 
# Dc =      1.24 FOOO =    368.00 Mu =      6.98 M =    343.42

_chemical_formula_sum             'C20 H25 N1 O4'
_chemical_formula_moiety          'C20 H25 N1 O4'
_chemical_compound_source                .
_chemical_formula_weight            343.42
 
_cell_measurement_reflns_used         6425
_cell_measurement_theta_min              3
_cell_measurement_theta_max             77
_cell_measurement_temperature          150
 
_exptl_crystal_description        'block' 
_exptl_crystal_colour             'colourless' 
_exptl_crystal_size_min           0.070 
_exptl_crystal_size_mid           0.090 
_exptl_crystal_size_max           0.160 
 
_exptl_crystal_density_diffrn     1.243 
_exptl_crystal_density_meas       . 
_exptl_crystal_density_method     'not measured' 
# Non-dispersive F(000): 
_exptl_crystal_F_000              368 
_exptl_absorpt_coefficient_mu     0.698 
 
# Sheldrick geometric approximatio 0.94 0.95 
_exptl_absorpt_correction_type    multi-scan 
_exptl_absorpt_process_details    'CrysAlis, (Oxford Diffraction, 2002)' 
_exptl_absorpt_correction_T_min   0.61 
_exptl_absorpt_correction_T_max   0.95 
_diffrn_measurement_device_type   'Oxford Diffraction SuperNova' 
_diffrn_measurement_device        'Area' 
_diffrn_radiation_monochromator   'graphite' 
_diffrn_radiation_type            'Cu K\a'
_diffrn_radiation_wavelength           1.54180
_diffrn_measurement_method        \w 
 
# If a reference occurs more than once, delete the author 
# and date from subsequent references. 
_computing_data_collection        'SuperNova, (Oxford Diffraction, 2010)' 
_computing_cell_refinement        'CrysAlis, (Oxford Diffraction, 2002)' 
_computing_data_reduction         'CrysAlis, (Oxford Diffraction, 2002)' 
_computing_structure_solution     'SIR92 (Altomare et al., 1994)' 
_computing_structure_refinement   'CRYSTALS (Betteridge et al., 2003)' 
_computing_publication_material   'CRYSTALS (Betteridge et al., 2003)' 
_computing_molecular_graphics     'CAMERON (Watkin et al., 1996)' 
 
_diffrn_standards_interval_time   . 
_diffrn_standards_interval_count  . 
_diffrn_standards_number          0 
_diffrn_standards_decay_%         . 
 
_diffrn_ambient_temperature        150
_diffrn_reflns_number             11466 
_reflns_number_total              3813 
_diffrn_reflns_av_R_equivalents   0.024 
# Number of reflections without Friedels Law is 3813 
# Number of reflections with Friedels Law is 2080 
# Theoretical number of reflections is about 1934 
 
_diffrn_reflns_theta_min          3.474 
_diffrn_reflns_theta_max          76.757 
_diffrn_measured_fraction_theta_max 0.995 
 
_diffrn_reflns_theta_full         75.222 
_diffrn_measured_fraction_theta_full 0.998 
 
_diffrn_reflns_limit_h_min        -12 
_diffrn_reflns_limit_h_max        12 
_diffrn_reflns_limit_k_min        -8 
_diffrn_reflns_limit_k_max        8 
_diffrn_reflns_limit_l_min        -16 
_diffrn_reflns_limit_l_max        16 
_reflns_limit_h_min               -12 
_reflns_limit_h_max               12 
_reflns_limit_k_min               -8 
_reflns_limit_k_max               8 
_reflns_limit_l_min               0 
_reflns_limit_l_max               16 
 
_oxford_diffrn_Wilson_B_factor    2.26 
_oxford_diffrn_Wilson_scale       0.01 
 
_atom_sites_solution_primary      direct #heavy,direct,difmap,geom
# _atom_sites_solution_secondary  difmap
_atom_sites_solution_hydrogens    difmap
 
_refine_diff_density_min          -0.14 
_refine_diff_density_max          0.20 
 
# The current dictionary definitions do not cover the 
# situation where the reflections used for refinement were 
# selected by a user-defined sigma threshold 
 
# The values actually used during refinement 
_oxford_reflns_threshold_expression_ref     I>0.0\s(I)
_refine_ls_number_reflns          3796 
_refine_ls_number_restraints      1 
_refine_ls_number_parameters      227 
_oxford_refine_ls_R_factor_ref    0.0326 
_refine_ls_wR_factor_ref          0.0640 
_refine_ls_goodness_of_fit_ref    1.0000 
_refine_ls_shift/su_max           0.0003250 
_refine_ls_shift/su_mean          0.0000308 
 
# The values computed with all filters except I/sigma 
_oxford_reflns_number_all         3797 
_refine_ls_R_factor_all           0.0326 
_refine_ls_wR_factor_all          0.0640 
 
# The values computed with a 2 sigma cutoff - a la SHELX 
_reflns_threshold_expression      I>2.0\s(I)
_reflns_number_gt                 3635 
_refine_ls_R_factor_gt            0.0308 
_refine_ls_wR_factor_gt           0.0624 
 
_refine_ls_abs_structure_Flack    -0.05(16) 
_refine_ls_abs_structure_details  'Flack (1983), 1733 Friedel-pairs' 
# choose from: rm (reference molecule of known chirality), 
# ad (anomolous dispersion - Flack), rmad (rm and ad), 
# syn (from synthesis), unk (unknown) or . (not applicable). 
_chemical_absolute_configuration  'ad' 
 
_refine_ls_structure_factor_coef  Fsqd 
_refine_ls_matrix_type            full
_refine_ls_hydrogen_treatment     constr         #undef, noref, refall,
                                                 # refxyz, refU, constr or mixed
# WARNING. The IUCr will not accept Unit Weights 
_refine_ls_weighting_scheme       calc 
_refine_ls_weighting_details 
;
 Method= Quasi-Unit weights 
 W = 1.0 or 1./2F 
;
# Insert your own references if required - in alphabetical order 
_publ_section_references 
; 
Altomare, A., Cascarano, G., Giacovazzo, C., Guagliardi, A., Burla, M.C., 
Polidori, G. & Camalli, M. (1994). J. Appl. Cryst. 27, 435. 
 
Betteridge, P.W., Carruthers, J.R., Cooper, R.I., 
Prout, K. & Watkin, D.J. (2003). J. Appl. Cryst. 36, 1487. 
 
Flack, H. D. (1983). Acta Cryst. A39, 876-881. 
 
Oxford Diffraction, (2010). CrysAlisPro. 
 
Oxford Diffraction, (2010). Supernova User Manual. 
 
Watkin, D.J., Prout, C.K. & Pearce, L.J. (1996). CAMERON, Chemical 
Crystallography Laboratory, Oxford, UK. 
; 

# Uequiv = arithmetic mean of Ui i.e. Ueqiv = (U1+U2+U3)/3

# Replace last . with number of unfound hydrogen atoms attached to an atom.

# ..._refinement_flags_... 
# . no refinement constraints           S special position constraint on site
# G rigid group refinement of site      R riding atom
# D distance or angle restraint on site T thermal displacement constraints
# U Uiso or Uij restraint (rigid bond)  P partial occupancy constraint

loop_
_atom_site_label
_atom_site_type_symbol
_atom_site_fract_x
_atom_site_fract_y
_atom_site_fract_z
_atom_site_U_iso_or_equiv
_atom_site_occupancy
_atom_site_adp_type
_atom_site_refinement_flags_posn
_atom_site_refinement_flags_adp
_atom_site_refinement_flags_occupancy
_atom_site_disorder_assembly
_atom_site_disorder_group
_atom_site_attached_hydrogens
O1 O 0.68221(10) 0.31975(16) 0.60561(8) 0.0217 1.0000 Uani . . . . . . 
C2 C 0.73693(14) 0.1952(2) 0.53756(11) 0.0183 1.0000 Uani . . . . . . 
C3 C 0.63975(14) 0.0321(2) 0.50304(12) 0.0188 1.0000 Uani . . . . . . 
O4 O 0.51280(10) 0.11137(16) 0.45897(8) 0.0233 1.0000 Uani . . . . . . 
C5 C 0.69202(14) -0.0909(2) 0.42384(12) 0.0199 1.0000 Uani . . . . . . 
O6 O 0.59943(10) -0.23369(16) 0.37855(9) 0.0265 1.0000 Uani . . . . . . 
C7 C 0.72222(14) 0.0288(2) 0.33430(12) 0.0200 1.0000 Uani . . . . . . 
N8 N 0.82194(11) 0.17365(18) 0.37738(9) 0.0178 1.0000 Uani . . . . . . 
C9 C 0.76737(13) 0.3101(2) 0.44467(11) 0.0175 1.0000 Uani . . . . . . 
C10 C 0.86174(14) 0.4734(2) 0.48485(12) 0.0208 1.0000 Uani . . . . . . 
O11 O 0.98420(10) 0.39837(16) 0.54050(9) 0.0263 1.0000 Uani . . . . . . 
C12 C 0.88258(14) 0.2580(2) 0.29419(12) 0.0219 1.0000 Uani . . . . . . 
C13 C 0.78793(15) 0.3406(2) 0.19990(11) 0.0236 1.0000 Uani . . . . . . 
C14 C 0.75679(17) 0.2366(3) 0.10669(13) 0.0326 1.0000 Uani . . . . . . 
C15 C 0.67070(19) 0.3107(3) 0.01949(13) 0.0416 1.0000 Uani . . . . . . 
C16 C 0.61381(19) 0.4883(3) 0.02465(14) 0.0411 1.0000 Uani . . . . . . 
C17 C 0.64293(19) 0.5936(3) 0.11663(14) 0.0380 1.0000 Uani . . . . . . 
C18 C 0.73008(17) 0.5188(2) 0.20387(13) 0.0294 1.0000 Uani . . . . . . 
C19 C 0.76304(16) 0.3426(3) 0.70878(12) 0.0302 1.0000 Uani . . . . . . 
C20 C 0.77890(17) 0.1617(3) 0.77279(12) 0.0304 1.0000 Uani . . . . . . 
C21 C 0.66990(18) 0.0477(3) 0.77759(14) 0.0345 1.0000 Uani . . . . . . 
C22 C 0.6837(2) -0.1164(3) 0.83915(16) 0.0456 1.0000 Uani . . . . . . 
C23 C 0.8072(2) -0.1666(4) 0.89789(17) 0.0555 1.0000 Uani . . . . . . 
C24 C 0.9153(2) -0.0529(4) 0.89355(17) 0.0572 1.0000 Uani . . . . . . 
C25 C 0.90215(19) 0.1097(3) 0.83101(15) 0.0434 1.0000 Uani . . . . . . 
H21 H 0.8235 0.1355 0.5776 0.0227 1.0000 Uiso R . . . . . 
H31 H 0.6340 -0.0497 0.5672 0.0222 1.0000 Uiso R . . . . . 
H51 H 0.7762 -0.1469 0.4610 0.0243 1.0000 Uiso R . . . . . 
H71 H 0.7629 -0.0553 0.2873 0.0235 1.0000 Uiso R . . . . . 
H72 H 0.6383 0.0894 0.2964 0.0245 1.0000 Uiso R . . . . . 
H91 H 0.6821 0.3637 0.4046 0.0221 1.0000 Uiso R . . . . . 
H101 H 0.8169 0.5517 0.5323 0.0271 1.0000 Uiso R . . . . . 
H102 H 0.8765 0.5545 0.4230 0.0255 1.0000 Uiso R . . . . . 
H121 H 0.9326 0.1559 0.2686 0.0279 1.0000 Uiso R . . . . . 
H122 H 0.9484 0.3576 0.3271 0.0278 1.0000 Uiso R . . . . . 
H141 H 0.7962 0.1087 0.1020 0.0386 1.0000 Uiso R . . . . . 
H151 H 0.6525 0.2359 -0.0460 0.0496 1.0000 Uiso R . . . . . 
H161 H 0.5547 0.5375 -0.0357 0.0516 1.0000 Uiso R . . . . . 
H171 H 0.6037 0.7176 0.1200 0.0478 1.0000 Uiso R . . . . . 
H181 H 0.7510 0.5924 0.2697 0.0370 1.0000 Uiso R . . . . . 
H191 H 0.8521 0.3865 0.7001 0.0373 1.0000 Uiso R . . . . . 
H192 H 0.7199 0.4414 0.7456 0.0380 1.0000 Uiso R . . . . . 
H211 H 0.5842 0.0871 0.7370 0.0426 1.0000 Uiso R . . . . . 
H221 H 0.6058 -0.1968 0.8428 0.0567 1.0000 Uiso R . . . . . 
H231 H 0.8161 -0.2849 0.9401 0.0682 1.0000 Uiso R . . . . . 
H241 H 1.0016 -0.0889 0.9330 0.0715 1.0000 Uiso R . . . . . 
H251 H 0.9780 0.1885 0.8258 0.0553 1.0000 Uiso R . . . . . 
H41 H 0.4638 0.0149 0.4335 0.0393 1.0000 Uiso R . . . . . 
H111 H 1.0368 0.4956 0.5538 0.0433 1.0000 Uiso R . . . . . 
H61 H 0.5596 -0.2852 0.4235 0.0428 1.0000 Uiso R . . . . . 
loop_
_atom_site_aniso_label
_atom_site_aniso_U_11
_atom_site_aniso_U_22
_atom_site_aniso_U_33
_atom_site_aniso_U_23
_atom_site_aniso_U_13
_atom_site_aniso_U_12
O1 0.0200(5) 0.0209(5) 0.0251(5) -0.0036(4) 0.0066(4) 0.0007(4) 
C2 0.0156(6) 0.0152(7) 0.0247(7) -0.0020(6) 0.0057(5) 0.0019(5) 
C3 0.0161(7) 0.0153(6) 0.0263(7) 0.0008(6) 0.0072(6) -0.0002(6) 
O4 0.0149(5) 0.0198(5) 0.0358(6) -0.0057(5) 0.0067(4) 0.0000(4) 
C5 0.0170(6) 0.0140(6) 0.0302(8) -0.0014(6) 0.0081(6) -0.0016(5) 
O6 0.0261(5) 0.0199(5) 0.0371(6) -0.0073(5) 0.0150(5) -0.0094(4) 
C7 0.0189(7) 0.0160(7) 0.0263(7) -0.0025(6) 0.0073(6) -0.0024(6) 
N8 0.0170(6) 0.0140(5) 0.0237(6) 0.0001(5) 0.0070(5) -0.0004(5) 
C9 0.0140(6) 0.0140(7) 0.0247(7) -0.0003(6) 0.0044(5) 0.0014(5) 
C10 0.0172(7) 0.0153(7) 0.0292(8) -0.0006(6) 0.0032(6) 0.0000(6) 
O11 0.0158(5) 0.0184(5) 0.0413(6) -0.0004(5) -0.0019(4) -0.0022(4) 
C12 0.0193(7) 0.0194(7) 0.0295(8) 0.0007(6) 0.0105(6) -0.0007(6) 
C13 0.0244(7) 0.0243(8) 0.0244(7) 0.0016(6) 0.0101(6) -0.0055(6) 
C14 0.0376(9) 0.0319(9) 0.0308(8) -0.0058(7) 0.0132(7) -0.0040(7) 
C15 0.0470(11) 0.0535(12) 0.0247(8) -0.0064(9) 0.0083(7) -0.0128(10) 
C16 0.0405(10) 0.0538(12) 0.0268(9) 0.0086(8) 0.0012(7) -0.0058(9) 
C17 0.0403(10) 0.0353(10) 0.0360(10) 0.0074(8) 0.0024(8) 0.0030(8) 
C18 0.0353(9) 0.0259(8) 0.0264(8) 0.0017(7) 0.0046(7) 0.0005(7) 
C19 0.0326(8) 0.0316(9) 0.0259(8) -0.0084(7) 0.0050(6) -0.0041(7) 
C20 0.0341(9) 0.0366(9) 0.0226(8) -0.0043(7) 0.0106(6) 0.0064(7) 
C21 0.0389(9) 0.0363(10) 0.0302(8) 0.0021(7) 0.0111(7) 0.0053(8) 
C22 0.0584(13) 0.0419(11) 0.0414(11) 0.0073(9) 0.0212(9) 0.0046(10) 
C23 0.0701(15) 0.0571(14) 0.0461(12) 0.0196(11) 0.0278(11) 0.0275(12) 
C24 0.0516(13) 0.0814(18) 0.0414(11) 0.0162(11) 0.0156(10) 0.0349(12) 
C25 0.0341(9) 0.0639(13) 0.0346(10) 0.0021(9) 0.0125(8) 0.0102(9) 

_refine_ls_extinction_method 
    'None'
_oxford_refine_ls_scale 11.2(2) 
loop_
 _geom_bond_atom_site_label_1
 _geom_bond_site_symmetry_1
 _geom_bond_atom_site_label_2
 _geom_bond_site_symmetry_2
 _geom_bond_distance
 _geom_bond_publ_flag
O1 . C2 . 1.4355(16)    yes
O1 . C19 . 1.4369(18)    yes
C2 . C3 . 1.5239(19)    yes
C2 . C9 . 1.5342(18)    yes
C2 . H21 . 1.027    no
C3 . O4 . 1.4307(17)    yes
C3 . C5 . 1.5213(19)    yes
C3 . H31 . 1.022    no
O4 . H41 . 0.867    no
C5 . O6 . 1.4235(17)    yes
C5 . C7 . 1.5156(19)    yes
C5 . H51 . 0.986    no
O6 . H61 . 0.859    no
C7 . N8 . 1.4708(18)    yes
C7 . H71 . 0.999    no
C7 . H72 . 0.999    no
N8 . C9 . 1.4800(17)    yes
N8 . C12 . 1.4771(17)    yes
C9 . C10 . 1.522(2)    yes
C9 . H91 . 1.000    no
C10 . O11 . 1.4228(17)    yes
C10 . H101 . 1.005    no
C10 . H102 . 1.020    no
O11 . H111 . 0.865    no
C12 . C13 . 1.517(2)    yes
C12 . H121 . 0.978    no
C12 . H122 . 1.005    no
C13 . C14 . 1.393(2)    yes
C13 . C18 . 1.386(2)    yes
C14 . C15 . 1.390(3)    yes
C14 . H141 . 0.988    no
C15 . C16 . 1.380(3)    yes
C15 . H151 . 0.984    no
C16 . C17 . 1.383(3)    yes
C16 . H161 . 0.955    no
C17 . C18 . 1.398(2)    yes
C17 . H171 . 0.961    no
C18 . H181 . 0.983    no
C19 . C20 . 1.504(2)    yes
C19 . H191 . 0.997    no
C19 . H192 . 0.995    no
C20 . C21 . 1.390(2)    yes
C20 . C25 . 1.390(2)    yes
C21 . C22 . 1.389(3)    yes
C21 . H211 . 0.973    no
C22 . C23 . 1.391(3)    yes
C22 . H221 . 0.990    no
C23 . C24 . 1.380(3)    yes
C23 . H231 . 0.985    no
C24 . C25 . 1.387(3)    yes
C24 . H241 . 0.967    no
C25 . H251 . 0.971    no
loop_
 _geom_angle_atom_site_label_1
 _geom_angle_site_symmetry_1
 _geom_angle_atom_site_label_2
 _geom_angle_site_symmetry_2
 _geom_angle_atom_site_label_3
 _geom_angle_site_symmetry_3
 _geom_angle
 _geom_angle_publ_flag
C2 . O1 . C19 . 114.54(11)    yes
O1 . C2 . C3 . 108.46(11)    yes
O1 . C2 . C9 . 109.65(10)    yes
C3 . C2 . C9 . 112.79(11)    yes
O1 . C2 . H21 . 110.2    no
C3 . C2 . H21 . 107.4    no
C9 . C2 . H21 . 108.4    no
C2 . C3 . O4 . 108.86(11)    yes
C2 . C3 . C5 . 108.59(11)    yes
O4 . C3 . C5 . 111.70(12)    yes
C2 . C3 . H31 . 108.8    no
O4 . C3 . H31 . 110.1    no
C5 . C3 . H31 . 108.8    no
C3 . O4 . H41 . 105.6    no
C3 . C5 . O6 . 112.03(11)    yes
C3 . C5 . C7 . 111.34(12)    yes
O6 . C5 . C7 . 107.14(12)    yes
C3 . C5 . H51 . 106.9    no
O6 . C5 . H51 . 112.1    no
C7 . C5 . H51 . 107.3    no
C5 . O6 . H61 . 112.7    no
C5 . C7 . N8 . 108.94(11)    yes
C5 . C7 . H71 . 108.8    no
N8 . C7 . H71 . 106.8    no
C5 . C7 . H72 . 108.6    no
N8 . C7 . H72 . 111.5    no
H71 . C7 . H72 . 112.2    no
C7 . N8 . C9 . 110.32(10)    yes
C7 . N8 . C12 . 111.34(11)    yes
C9 . N8 . C12 . 116.35(11)    yes
C2 . C9 . N8 . 106.91(10)    yes
C2 . C9 . C10 . 109.96(11)    yes
N8 . C9 . C10 . 113.05(11)    yes
C2 . C9 . H91 . 107.8    no
N8 . C9 . H91 . 109.5    no
C10 . C9 . H91 . 109.4    no
C9 . C10 . O11 . 109.83(12)    yes
C9 . C10 . H101 . 106.0    no
O11 . C10 . H101 . 111.2    no
C9 . C10 . H102 . 109.5    no
O11 . C10 . H102 . 110.2    no
H101 . C10 . H102 . 110.0    no
C10 . O11 . H111 . 105.6    no
N8 . C12 . C13 . 116.32(11)    yes
N8 . C12 . H121 . 106.8    no
C13 . C12 . H121 . 107.5    no
N8 . C12 . H122 . 108.4    no
C13 . C12 . H122 . 110.4    no
H121 . C12 . H122 . 107.0    no
C12 . C13 . C14 . 120.05(15)    yes
C12 . C13 . C18 . 121.54(14)    yes
C14 . C13 . C18 . 118.41(15)    yes
C13 . C14 . C15 . 120.70(17)    yes
C13 . C14 . H141 . 120.0    no
C15 . C14 . H141 . 119.3    no
C14 . C15 . C16 . 120.22(17)    yes
C14 . C15 . H151 . 119.0    no
C16 . C15 . H151 . 120.7    no
C15 . C16 . C17 . 119.99(17)    yes
C15 . C16 . H161 . 119.4    no
C17 . C16 . H161 . 120.6    no
C16 . C17 . C18 . 119.55(18)    yes
C16 . C17 . H171 . 119.9    no
C18 . C17 . H171 . 120.6    no
C17 . C18 . C13 . 121.13(16)    yes
C17 . C18 . H181 . 120.1    no
C13 . C18 . H181 . 118.8    no
O1 . C19 . C20 . 113.59(13)    yes
O1 . C19 . H191 . 107.6    no
C20 . C19 . H191 . 108.8    no
O1 . C19 . H192 . 107.1    no
C20 . C19 . H192 . 109.1    no
H191 . C19 . H192 . 110.7    no
C19 . C20 . C21 . 120.54(15)    yes
C19 . C20 . C25 . 120.36(17)    yes
C21 . C20 . C25 . 119.06(18)    yes
C20 . C21 . C22 . 120.63(18)    yes
C20 . C21 . H211 . 118.0    no
C22 . C21 . H211 . 121.4    no
C21 . C22 . C23 . 120.0(2)    yes
C21 . C22 . H221 . 120.4    no
C23 . C22 . H221 . 119.6    no
C22 . C23 . C24 . 119.4(2)    yes
C22 . C23 . H231 . 119.2    no
C24 . C23 . H231 . 121.3    no
C23 . C24 . C25 . 120.8(2)    yes
C23 . C24 . H241 . 119.6    no
C25 . C24 . H241 . 119.6    no
C20 . C25 . C24 . 120.2(2)    yes
C20 . C25 . H251 . 118.4    no
C24 . C25 . H251 . 121.4    no
loop_
 _geom_hbond_atom_site_label_D
 _geom_hbond_site_symmetry_D
 _geom_hbond_atom_site_label_H
 _geom_hbond_site_symmetry_H
 _geom_hbond_atom_site_label_A
 _geom_hbond_site_symmetry_A
 _geom_hbond_angle_DHA
 _geom_hbond_distance_DH
 _geom_hbond_distance_HA
 _geom_hbond_distance_DA
 _geom_hbond_publ_flag
C5 . H51 . O11 2_746 136.23(4) 0.986 2.497 3.280(2)    yes
C21 . H211 . O6 2_656 164.02(5) 0.973 2.502 3.448(2)    yes
O4 . H41 . O1 2_646 165.64(4) 0.867 2.019 2.867(2)    yes
O11 . H111 . N8 2_756 162.83(5) 0.865 1.986 2.824(2)    yes
O6 . H61 . O4 2_646 172.38(4) 0.859 1.969 2.822(2)    yes
